# Supplementary material
Source: Springer Nature journal article supplement (https://www.springermedizin.de/resource/supplementary/12936_2012_2595_MOESM1_ESM.pdf/9543154)

Day 0

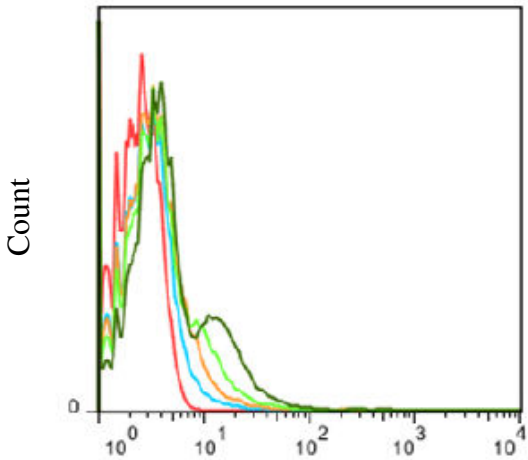

FITC-A

Day 84

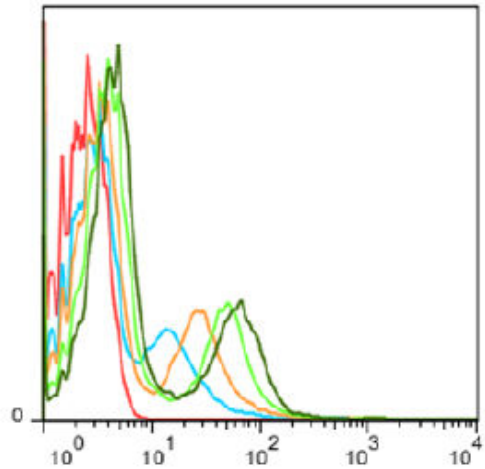

FITC-A

Supplement: MOESM1 [file 9543154]
